# Supplementary material for: Dual purpose poly(3,4-ethylenedioxypyrrole)/vanadium pentoxide nanobelt hybrids in photoelectrochromic cells and supercapacitors
Source: Royal Society of Chemistry journal article supplement (doi:10.1039/c5ra05015d), 2015-01-01
Supplement: c5ra05015d1.pdf [file c5ra05015d1.pdf]

## Supporting information

**Table S1** Parameters of photoelectrochromic cells with CdS/TiO<sub>2</sub> as photoanode, 0.1 M Na<sub>2</sub>S electrolyte, under 1 sun illumination ( $\lambda > 300$  nm, 100 mW cm<sup>-2</sup>); with different counter electrodes.

| Counter Electrode                          | V <sub>OC</sub> (V) | J <sub>SC</sub> (mA cm <sup>-2</sup> ) | FF    | $\eta$ (efficiency, %) |
|--------------------------------------------|---------------------|----------------------------------------|-------|------------------------|
| V <sub>2</sub> O <sub>5</sub> nanobelts    | 0.672               | 6.15                                   | 32.65 | 1.43                   |
| PEDOP                                      | 0.714               | 6.14                                   | 43.01 | 1.88                   |
| PEDOP/V <sub>2</sub> O <sub>5</sub> hybrid | 0.611               | 7.21                                   | 48.79 | 1.44                   |

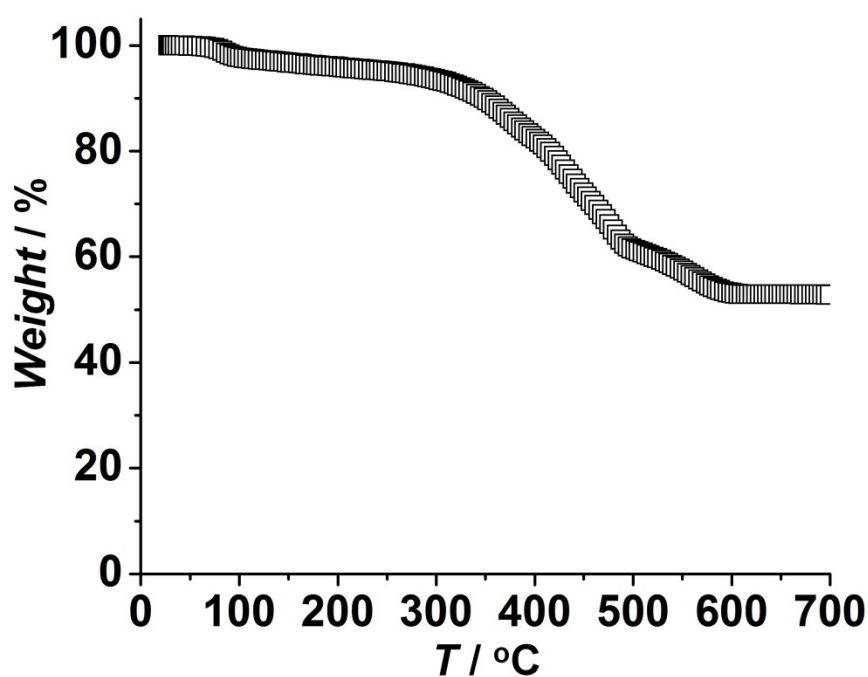

Figure S1. TGA plot of a PEDOP/V<sub>2</sub>O<sub>5</sub> hybrid.

From the TGA plot, the amount of PEDOP in the hybrid was deduced to be 46% by weight, and therefore the V<sub>2</sub>O<sub>5</sub> proportion is ~54% by weight.
